# Supplementary material
Source: publisher figshare collection journal article supplement (https://tandf.figshare.com/ndownloader/files/15279596)
Supplement: Supplementary file 1 [file 15279596]

**Supplementary Information**

**Detection of Lethal Fake Liquors Using Digitally Labelled Gas-phase Fourier Transform Infrared Spectroscopy**

Da Chen,a Zong Tan,a Zhixuan Huang,a Yue Lv,a Qifeng Li*a

a School of Precision Instrument and Opto-Electronics Engineering, Tianjin University, Tianjin 300072, China

*corresponding author. E-mail: [qfli@tju.edu.cn](mailto:qfli@tju.edu.cn)


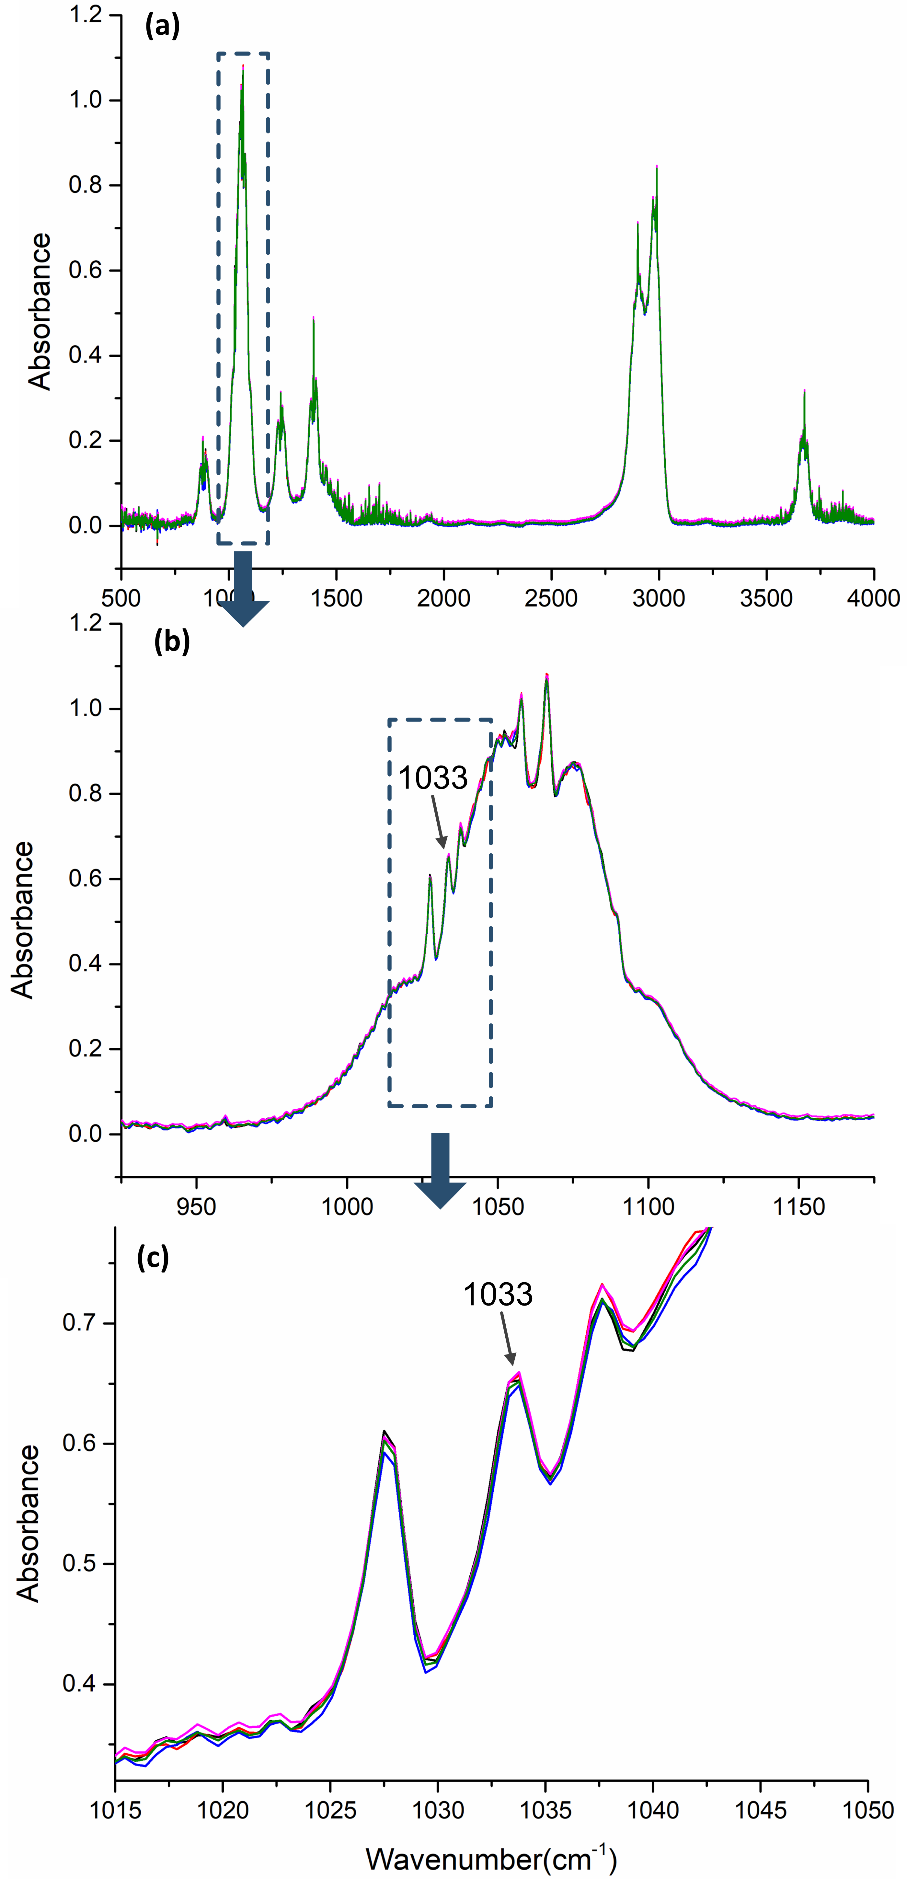


Figure S1. Gas-phase Fourier transform infrared spectra of one alcoholic sample in 5 parallel experiments. (a) Full spectra in the range of 400-4000 cm-1. (b) Partially enlarged details in the range of 930-1180 cm-1. (c) Partially enlarged details in the range of 1015-1050 cm-1 for more specific view.

Fig. S1 shows the G-FTIR spectra of one alcoholic sample (methanol content of 0.8%) in 5 parallel experiments. As shown in Fig. S1, the difference among spectra obtained from parallel experiments is slight. The relative standard deviation (RSD) of the spectra was calculated. For example, the RSD of peak 1033 cm-1 was calculated as 0.67%, indicating good reproducibility of the G-FTIR method.
